# Supplementary material for: Prevalence, incidence and mortality of type 1 and type 2 diabetes in Denmark 1996–2016
Source: PubMed Central journal article supplement — BMJ Open Diabetes Res Care. 2020 May 31;8(1):e001071. doi: 10.1136/bmjdrc-2019-001071 (PMC7265004; doi:10.1136/bmjdrc-2019-001071), 2020-05-31
Supplement: bmjdrc-2019-001071supp001.pdf [file bmjdrc-2019-001071supp001.pdf]

# Prevalence, incidence and mortality of type 1 and type 2 diabetes in Denmark 1996–2016

## Electronic Supplementary Material

---

SDCC

<http://bendixcarstensen.com/>

March 2020

Version 4

Compiled Tuesday 3<sup>rd</sup> March, 2020, 11:17

from: /home/bendix/sdc/DMreg/NewReg/art/DMDK/ESM.tex

Bendix Carstensen    Steno Diabetes Center Copenhagen, Gentofte, Denmark  
Senior Statistician    Clinical Epidemiology  
                                 & Department of Biostatistics, University of Copenhagen  
                                 [bcar0029@regionh.dk](mailto:bcar0029@regionh.dk)    [b@bxc.dk](mailto:b@bxc.dk)  
                                 <http://BendixCarstensen.com>

## Contents

|          |                                    |          |
|----------|------------------------------------|----------|
| <b>1</b> | <b>Material and methods</b>        | <b>1</b> |
| 1.1      | Register data                      | 1        |
| 1.1.1    | Diabetes data                      | 1        |
| 1.1.2    | Population data                    | 3        |
| 1.2      | Tabulation of data                 | 3        |
| 1.2.1    | Prevalence                         | 3        |
| 1.2.2    | Follow-up                          | 3        |
| 1.3      | Statistical methods                | 4        |
| 1.3.1    | Prevalence                         | 4        |
| 1.3.2    | Incidence rates                    | 4        |
| 1.3.3    | Mortality rates                    | 4        |
| 1.3.4    | Age, duration and age at diagnosis | 5        |
| 1.3.5    | Mortality data range               | 6        |
| 1.3.6    | Standardized Mortality Ratio (SMR) | 6        |
| 1.4      | Sensitivity analyses               | 6        |
|          | <b>References</b>                  | <b>7</b> |

## List of Tables

|   |                                                                                                             |    |
|---|-------------------------------------------------------------------------------------------------------------|----|
| 1 | Persons, follow-up time and ages and dates of entry and follow-up from the Danish Diabetes Register.        | 8  |
| 2 | Number of prevalent diabetes patients in Denmark at 1 January each year 1996–2017 by diabetes type and sex. | 9  |
| 3 | Crude prevalence (%) of diabetes in Denmark at 1 January 1996–2017 by diabetes type and sex.                | 10 |
| 4 | Number of incident diabetes cases during each year 1996–2016 by diabetes type and sex.                      | 11 |
| 5 | Number of deaths among diabetes patients during each year 1996–2016 by diabetes type and sex.               | 12 |
| 6 | Number of deaths among diabetes patients during each year 1996–2016 by diabetes type and sex.               | 13 |

## List of Figures

|   |                                                                                                          |    |
|---|----------------------------------------------------------------------------------------------------------|----|
| 1 | Age-specific number of diabetes in Denmark as of 1 January 2017 by type                                  | 14 |
| 2 | Age-specific average annual change in incidence rates of T1D and T2D in Denmark 1996–2016.               | 15 |
| 3 | Incidence rates of T1D and T2D: Age-Period-Cohort model effects.                                         | 16 |
| 4 | Mortality, and RR relative to 2015-01-01 and birth cohort residuals.                                     | 17 |
| 5 | Mortality, and RR relative to 2015-01-01 and birth cohort residuals, with follow-up restricted to 2005+. | 18 |
| 6 | T1D versus T2D mortality RR at 2015                                                                      | 19 |
| 7 | SMR, SMR-ratios relative to 2015-01-01 and birth cohort residuals.                                       | 20 |

# 1 Material and methods

This section provides further details on the underlying register and the statistical methods used in the analysis.

A complete documentation of the construction of the register and the analysis files of prevalence and follow-up can be found in <http://BendixCarstensen.com/DMreg/Reg2016.pdf>, and a complete account of all statistical analyses based on these is available in <http://BendixCarstensen.com/DMreg/Ana2016.pdf>. Both documents are approximately 300 pages, as they contain a complete code documentation and extensive tabulations of results.

## 1.1 Register data

The Danish national health care system (NHS) is run by the state (through 5 health care regions) and covers all Danish citizens free of charge. Thus all citizens are in the *same* system.

Furthermore, in Denmark (as in all Nordic Countries) there are population-wide registers covering virtually all aspects of life, including health care. All registers are linkable by a unique person id [1], so residents of Denmark can be followed with respect to disease occurrence, medicine purchase, health care use, migration etc.

The registers are available for research purposes at a secure server at Statistics Denmark in anonymized, linkable form; Statistics Denmark generates an id which can be used for linkage across the registers at our disposal, but not to identify a person. Thus, linkage is exact, not probabilistic.

### 1.1.1 Diabetes data

We constructed a Danish diabetes register from existing Danish health care registers. The five registers are considered to be those where diabetes patients will appear, so our approach has been to maximize sensitivity. We included persons as diabetes patients using the *earliest* of the following dates from the registers as inclusion date (all registers may have multiple records per person):

- first diagnosis of diabetes (ICD-8: 249, 250; ICD-10: E10, E11) in the National Patient Register [2] (NPR; 1977–). The NPR is a register of all contacts with the hospital system, from 1990 also including visits to out-patient clinics.
- first use of “podiatry for diabetes patients” as recorded in the National Health Services Register [3] (NHSR, 1990–). The NHSR includes all billings for health services paid to health care providers, and “podiatry for diabetes patients” are only available for persons with a referral from physician. Hence everyone in this database is a verified diabetes patient.
- first date of purchase of any anti-diabetic medication (ATC A10xxx) in the Medicines Products Register [4] (“Prescription register”) (MPR, 1995–). The MPR includes all filled prescriptions since 1995-01-01 with detailed information on product and amount, linked to the person-id.

- first date of diagnosis mentioned in the Danish Adult Diabetes Database [5] (DADD, 2005–). The DADD is a database for quality monitoring where clinical information on diabetes patients is reported annually by GPs and outpatient clinics. The reports include information on type of diabetes (as T1D, T2D or other type). Hence everyone in this database is a verified diabetes patient. The information from outpatient clinics is complete, but that from general practice is currently incomplete. But since all T1D patients are seen in outpatient clinics, this data base will identify all T1D patients, in the period of coverage.

The dates of diagnosis are inaccurate (83% are either 1 Jan or 15 Jul), so the date from DADD is only used if DADD is the only source for a given person. Thus DADD is mainly used for classification of patients as T1D/T2D.

- first date of eye examination recorded in the diaBase [6] (diaB, 2009–). The diaBase is a data base for quality monitoring of retinopathy screening, where eye-screenings of diabetes patients are reported. Hence everyone in this database is a verified diabetes patient.

In order to increase specificity of the recording we included only persons from the second date of either NPR or MPR recording; we extracted the two first dates of NPR recordings and the dates of two first MPR recording, and used the second of these four dates as the inclusion date.

Dates within 30 days prior and 365 days after a recorded diagnosis of gestational diabetes in the NPR were disregarded. Dates of metformin purchase between a date of polycystic ovary syndrome (PCOS) and the woman's 40<sup>th</sup> birthday were disregarded. Purchase of metformin in women between 18 and 40 were disregarded because purchase of metformin alone was considered most likely to be part of treatment of infertility in a PCOS patient.

**Type of diabetes:** A person was classified as T1D from DADD if the majority of the person's records classified the person as T1D, and similarly for T2D. Persons not meeting any of these criteria were left unclassified by the DADD — this would be persons classified as other type of DM or with an equal number of classifications as T1D and T2D.

A person was classified as T1D from NPR if the majority of the person's records classified the person as T1D, and similarly for T2D. Persons not meeting any of these criteria were left unclassified by the NPR — this would be persons with an equal number of records with classification as T1D and T2D.

Persons were classified as T1D in the diabetes register if any of the following criteria were met (and otherwise as T2D):

- Purchase of oral anti-diabetic drugs (OAD) before age 15
- Purchase of insulin before age 30
- DADD classification as T1D.
- Unclassified from DADD, but classified as T1D from NPR.

Finally, persons without a recorded insulin purchase in the MPR, will always be classified a T2D regardless of the above. Persons not classified as T1D are classified as T2D.

The main source of T1D status was the DADD, which however only comprises persons alive at 2005 or later, so the sensitivity of the T1D classification is declining backwards in time prior to 2005, particularly for persons who died before 2005.

Strictly speaking, the classification of persons by type (as of the date of inclusion) depends on recordings *later* than the date of inclusion, and so we are formally conditioning on the future in the definition of diabetes type.

**Time-range of the constructed register:** The MPR is complete from 1995-01-01, so if the first recorded anti-diabetic drug purchase was after 1996-01-01, *i.e.* after at least one year with no recorded purchase, we assumed that it was actually a first drug purchase for that person. Since the other major sources of information predates 1996, we assume the constructed register to be reliable as incidence register from 1996-01-01, with the persons in the register alive as of that date to be a reliable recording of prevalent cases. This implies that dates of entry to the register before 1996-01-01 are unreliable as dates of diagnosis of diabetes, and these persons are only included as prevalent cases of diabetes as of 1996-01-01. The latter limits analyses involving duration of diabetes to persons included in the register after 1996-01-01.

### 1.1.2 Population data

In addition to the registers mentioned above, we had access to complete individual level register information on the entire Danish population, including sex and dates of birth, emigration, immigration and death as well as cause of death.

## 1.2 Tabulation of data

With the described register information we were able to classify all follow-up time (person-years and events of diabetes and death) in the entire Danish resident population as being either without diabetes or with T1D or T2D. We have observations from the registers for the 21 calendar years 1996 through 2016, so the last date of observation is 2016-12-31, which we for convenience in connection with dates of prevalence will label as 2017-01-01 (or just 2017).

### 1.2.1 Prevalence

The number of prevalent cases of T1D and T2D separately, alive at 1 January 1996–2017 were tabulated by sex and 1-year age group. The corresponding total population counts at each date were derived from our total register of the Danish population.

### 1.2.2 Follow-up

Periods after emigration and before immigration were excluded from the tabulation of follow-up. The follow-up (time at risk, events of diabetes by type and death by cause) in the Danish population 1996–2016 incl. was tabulated by current diabetes status (no DM, T1D, T2D), sex, age and date of follow-up and date of birth in 1-year classes (Lexis triangles, [7]). As an example, persons who contribute follow-up in the age class 66 during the year 2006 are classified by date of birth in one of two groups: those born in 1939 (who are 66 years of age as of 2006-01-01), and those born in 1940 (who turn 66 during 2006).

Among those born in 1939 the mean age at follow-up is  $66\frac{2}{3}$ , and the mean date of follow-up is  $2006\frac{1}{3}$ , and consequently the mean date of birth  $1939\frac{2}{3}$ . Among those born in 1940 the mean age at follow-up is  $66\frac{1}{3}$ , and the mean date of follow-up is  $2006\frac{2}{3}$ , and consequently the mean date of birth is  $1940\frac{1}{3}$ .

Further, the follow-up among diabetes patients diagnosed after 1996-01-01 (for whom date of diagnosis was known) were further classified by duration of diabetes in intervals divided at 0, 0.2, 0.5, 1, 2, . . . years, *i.e.* with means 0.1, 0.35, 0.75, 1.5, 2.5, . . . years.

These mean values are used as *quantitative* variables in the modeling of age, calendar time, birth cohort and duration effects on incidence and mortality rates, as well as duration effects on mortality.

### 1.3 Statistical methods

All statistical models were fitted separately for men and women and for no DM (where relevant), T1D and T2D. For each tabulation unit (Lexis triangle) we used the mean of current age (occasionally termed attained age or age at follow-up), date and duration of diabetes and date of birth, as *quantitative* explanatory variables. The effect of these were modeled by natural splines (restricted cubic splines).

#### 1.3.1 Prevalence

We modeled prevalence separately for each of the dates 1 January 1996–2017 by restricted cubic splines for age, using a binomial model with log-link. The resulting age-curves were shown for each of the 22 dates. We also fitted models jointly for all dates with a linear effect of date in order to devise an overall annual relative change in prevalence.

#### 1.3.2 Incidence rates

Incidence rates were modeled using Poisson models with log person time as offset and natural cubic spline effects of current age and date of follow-up and date of birth (age-period-cohort (APC) model [7]). We used 2015-01-01 as reference point for calendar time, thus rendering the age-specific rates estimates of the rates as of this date, the period effects as estimates of RR relative to 2015-01-01 and the cohort effects as residual effects relative to this. We extracted the overall linear trend (drift) from the APC models. Finally, we also show the non-linear time-trends evaluated at different ages derived from these models.

#### 1.3.3 Mortality rates

Mortality rates were modeled using Poisson models with log person time as offset and natural cubic spine effects of calendar time, current age, duration of diabetes, age at diagnosis (calculated as current age minus duration).

We used 2015-01-01 as reference point for the calendar time, thus rendering the age-specific mortality rates estimates of the rates as of this date. As model check we also show the residuals by date of birth as RRs from this model.

### 1.3.4 Age, duration and age at diagnosis

Since the variables current age, duration and age at diagnosis are linearly connected (current age = age at diagnosis + duration of diabetes) we cannot separate the effects of them without further assumptions (see e.g. [7]). For example, we may claim that mortality increases more by current age, if we are willing to assume that it increases correspondingly less by diabetes duration and age at diabetes diagnosis. Hence if we include all three variables in a model we cannot make a claim as to an isolated effect of any particular of the three.

Specifically, suppose we aim to describe the mortality rates ( $\mu$ ) as a function of current age,  $a$ ; duration of diabetes,  $d$  and age at diagnosis,  $e = a - d$  (“ $e$ ” for age at diagnosis; entry into diabetes), then we have that  $a - d - e = 0$ . If we formally set up a model with only the effect of current age and age at diagnosis of diabetes:

$$\log(\mu(a, d)) = f(a) + h(e)$$

it is only superficially that this does not include duration: since  $a - d - e = 0$ , we may write:

$$\begin{aligned} \log(\mu(a, d)) &= f(a) + h(e) \\ &= f(a) + h(e) + \gamma(a - e - d) \\ &= (f(a) + \gamma a) + (h(e) - \gamma e) - \gamma d \end{aligned}$$

Thus, even if duration is not formally included in the model we may claim that it has any *linear* effect we like, by simply asserting that the age and age at diagnosis effects are different by a similar linear amount. Thus there is no way to allocate a “correct” duration effect, let alone effects of current age and age at diagnosis. One might of course on purely external grounds (*i.e.* unrelated to the data at hand) assert that there is no duration effect, but this can never be founded in data.

Therefore, it makes more sense to set up a model with non-linear effects of all three variables. But we still have the problem from the linear dependence:

$$\begin{aligned} \log(\mu(a, d)) &= f(a) + g(d) + h(e) \\ &= f(a) + g(d) + h(e) + \gamma(a - d - e) \\ &= (f(a) + \gamma a) + (g(d) - \gamma d) + (h(e) - \gamma e) \\ &= \tilde{f}(a) + \tilde{g}(d) + \tilde{h}(e) \end{aligned}$$

Here it is seen that we can have two *different* sets of three effects that together produce the same mortality rates; moreover this would be the case for *any* value of  $\gamma$  we care to stick into the formula.

Even if we cannot separate the three effects in the model, we can still make perfectly valid predictions from the model, and certain contrasts will also be identifiable from the model. Notably it is possible to estimate the mortality rate-ratio at a given age ( $a$ ) between persons diagnosed at different ages,  $e_1$  and  $e_0$ , and hence with durations  $a - e_1$  and  $a - e_0$ :

$$\begin{aligned} \log(\text{RR}_{e_1 \text{ vs } e_0}) &= f(a) + g(a - e_1) + h(e_1) - \\ &\quad f(a) - g(a - e_0) - h(e_0) \\ &= g(a - e_1) - g(a - e_0) + h(e_1) - h(e_0) \end{aligned}$$

Using another set of effects  $\tilde{f}$ ,  $\tilde{g}$  and  $\tilde{h}$  the sum of which is distinguished from these by a term  $\gamma(a - d - e)$ :

$$\begin{aligned} \log(\text{RR}_{e_1 \text{ vs } e_0}) &= \tilde{g}(a - e_1) - \tilde{g}(a - e_0) + \tilde{h}(e_1) - \tilde{h}(e_0) \\ &= (g(a - e_1) - \gamma(a - e_1)) - \\ &\quad (g(a - e_0) - \gamma(a - e_0)) + \\ &\quad (h(e_1) - \gamma e_1) - \\ &\quad (h(e_0) - \gamma e_0) \\ &= g(a - e_1) - g(a - e_0) + h(e_1) - h(e_0) + \gamma(-a + e_1 + a - e_0 - e_1 + e_0) \\ &= g(a - e_1) - g(a - e_0) + h(e_1) - h(e_0) \end{aligned}$$

This shows that these contrasts are invariant under *any* reparametrization, and hence *are* identifiable from any parametrization of the model.

Since the intercept and the linear effects of current age, age at diagnosis and duration of diabetes cannot be separated, we reported the estimated mortality as a function of current age, using separate curves for persons diagnosed at ages 30, 45 etc. (different between T1D and T2D); each curve stretching from the age at diagnosis and 20 years on (20 years being the range of duration for which we have reasonably reliable information). The mortality curves are thus showing the *joint* effect of current age, age at diagnosis and duration of disease (see *e.g.* [8].)

### 1.3.5 Mortality data range

Since only persons included after 1996-01-01 have a reliable date of diagnosis, mortality analyses using age at diagnosis and duration were restricted to persons included after this date. For comparability with other studies, age-specific mortality rates ignoring both age at diagnosis and duration were reported both for the restricted group of patients diagnosed after 1996-01-01 and for all patients (that is, also including the prevalent cases as of 1996-01-01).

Analyses were made separately for men and women and for T1D and T2D separately. We computed M/W mortality rate-ratios for each type of diabetes, and T1D/T2D mortality rate-ratios for men and women separately.

### 1.3.6 Standardized Mortality Ratio (SMR)

We used the data from persons without DM to calculate empirical mortality rates among persons without diabetes, classified by sex, age, date of follow-up and date of birth. Multiplying these with the corresponding person years among diabetes patients yielded the expected number of deaths during T1D and T2D follow-up.

The SMR was modeled exactly as the mortality by current age, duration of diabetes and age at diagnosis, but using the log of the expected number of deaths as offset deriving the SMR as the mortality rate-ratio between T1D, resp. T2D and no DM.

## 1.4 Sensitivity analyses

Due to the larger uncertainty of T1D/T2D classification prior to 2005 we made separate mortality analyses using only follow-up after 2005, shown in ESM figure 5 — compared



with ESM figure 4.

## References

- [1] Pedersen C.B. The Danish civil registration system. *Scand J Public Health*, 39 (7 suppl):22–25, July 2011.
- [2] E. Lynge, J. L. Sandegaard, and M. Rebolj. The Danish National Patient Register. *Scand J Public Health*, 39(7 Suppl):30–33, Jul 2011.
- [3] J. S. Andersen, N. de F. Olivarius, and A. Krasnik. The Danish National Health Service Register. *Scand J Public Health*, 39(7 Suppl):34–37, Jul 2011.
- [4] H. W. Kildemoes, H. T. Sørensen, and J. Hallas. The Danish National Prescription Registry. *Scand J Public Health*, 39(7 Suppl):38–41, Jul 2011.
- [5] M. E. Jørgensen, J. K. Kristensen, G. Reventlov Husted, C. Cerqueira, and P. Rossing. The Danish Adult Diabetes Registry. *Clin Epidemiol*, 8:429–434, 2016.
- [6] G. S. Andersen, Z. Kamper-Jørgensen, B. Carstensen, M. Nørredam, I. C. Bygbjerg, and M. E. Jørgensen. Diabetes among migrants in Denmark: Incidence, mortality, and prevalence based on a longitudinal register study of the entire Danish population. *Diabetes Res. Clin. Pract.*, 122:9–16, Sep 2016.
- [7] B Carstensen. Age-Period-Cohort models for the Lexis diagram. *Statistics in Medicine*, 26(15):3018–3045, July 2007.
- [8] L. Huo, D. J. Magliano, F. Ranciere, J. L. Harding, N. Nanayakkara, J. E. Shaw, and B. Carstensen. Impact of age at diagnosis and duration of type 2 diabetes on mortality in Australia 1997-2011. *Diabetologia*, Feb 2018.

Table ESM 1: *Persons, follow-up time and ages and dates of entry and follow-up from the Danish Diabetes Register. Includes also persons over 100 years of age and time during non-residency in Denmark. Medians and inter-quartile ranges (IQR, 25<sup>th</sup> and 75<sup>th</sup> percentiles). <1996 refer to the prevalent cases as of 1<sup>st</sup> January 1996; 1996+ refer to diabetes cases included in the register after this date.*

| No. persons | Sex | T1D    |  |  | T2D     |  | DM      |
|-------------|-----|--------|--|--|---------|--|---------|
| < 1996      | M   | 12,378 |  |  | 30,338  |  | 42,716  |
|             | W   | 9,596  |  |  | 31,129  |  | 40,725  |
|             | M+W | 21,974 |  |  | 61,467  |  | 83,441  |
| 1996+       | M   | 11,646 |  |  | 192,418 |  | 204,064 |
|             | W   | 8,173  |  |  | 152,767 |  | 160,940 |
|             | M+W | 19,819 |  |  | 345,185 |  | 365,004 |
| Total       | M+W | 41,793 |  |  | 406,652 |  | 448,445 |

  

|                                  |   | T1D    |        |        | T2D    |        |        |
|----------------------------------|---|--------|--------|--------|--------|--------|--------|
|                                  |   | Median | IQR    |        | Median | IQR    |        |
| Date of inclusion <sup>1,2</sup> |   |        |        |        |        |        |        |
| 1996+                            | M | 2005.7 | 2000.5 | 2010.9 | 2008.5 | 2003.1 | 2012.4 |
|                                  | W | 2005.6 | 2000.4 | 2011.0 | 2008.3 | 2002.8 | 2012.3 |
| Age at inclusion <sup>1</sup>    |   |        |        |        |        |        |        |
| 1996+                            | M | 30.7   | 15.7   | 47.6   | 62.1   | 53.0   | 70.6   |
|                                  | W | 26.8   | 12.4   | 48.5   | 64.6   | 54.1   | 74.2   |
| Person-years                     |   |        |        |        |        |        |        |
| < 1996                           | M | 21.0   | 9.5    | 21.0   | 8.9    | 3.6    | 18.2   |
|                                  | W | 21.0   | 9.3    | 21.0   | 9.1    | 3.8    | 18.9   |
| 1996+                            | M | 8.9    | 4.3    | 14.5   | 6.0    | 3.0    | 10.5   |
|                                  | W | 9.3    | 4.4    | 14.9   | 6.1    | 3.1    | 10.9   |
| Date of follow-up <sup>2,3</sup> |   |        |        |        |        |        |        |
| < 1996                           | M | 2006.5 | 2000.7 | 2006.5 | 2000.4 | 1997.8 | 2005.1 |
|                                  | W | 2006.5 | 2000.6 | 2006.5 | 2000.6 | 1997.9 | 2005.5 |
| 1996+                            | M | 2011.0 | 2008.0 | 2013.9 | 2012.5 | 2008.8 | 2014.6 |
|                                  | W | 2011.0 | 2008.1 | 2014.0 | 2012.3 | 2008.7 | 2014.6 |
| Age at follow-up <sup>3</sup>    |   |        |        |        |        |        |        |
| < 1996                           | M | 53.5   | 41.3   | 65.3   | 70.9   | 62.5   | 78.2   |
|                                  | W | 55.5   | 41.3   | 71.0   | 76.0   | 66.6   | 82.7   |
| 1996+                            | M | 36.5   | 20.6   | 52.4   | 65.9   | 57.1   | 73.9   |
|                                  | W | 32.4   | 17.4   | 53.8   | 68.4   | 58.2   | 77.7   |

<sup>1</sup> Persons included before 1996 do not have a reliable date of inclusion, hence neither date nor age at inclusion can be meaningfully computed.

<sup>2</sup> Dates are coded so that 1<sup>st</sup> January 2006 is 2006.000 and 31<sup>st</sup> December 2006 is 2006.997.

<sup>3</sup> Median and IQR for the median date/age of follow-up for each person.

## REFERENCES

9

Table ESM 2: *Number of prevalent diabetes patients in Denmark at 1 January each year 1996–2017 by diabetes type and sex. Includes also persons over 100 years of age.*

| Date | T1D    |        | T2D     |         | %T1  |      | All DM  |         |         |
|------|--------|--------|---------|---------|------|------|---------|---------|---------|
|      | M      | W      | M       | W       | M    | W    | M       | W       | M+W     |
| 1996 | 12,328 | 9,549  | 30,269  | 31,313  | 28.9 | 23.4 | 42,597  | 40,862  | 83,459  |
| 1997 | 12,677 | 9,776  | 33,790  | 34,110  | 27.3 | 22.3 | 46,467  | 43,886  | 90,353  |
| 1998 | 12,958 | 9,986  | 36,952  | 36,433  | 26.0 | 21.5 | 49,910  | 46,419  | 96,329  |
| 1999 | 13,222 | 10,113 | 40,711  | 39,166  | 24.5 | 20.5 | 53,933  | 49,279  | 103,212 |
| 2000 | 13,386 | 10,235 | 44,398  | 42,132  | 23.2 | 19.5 | 57,784  | 52,367  | 110,151 |
| 2001 | 13,560 | 10,295 | 47,960  | 44,905  | 22.0 | 18.7 | 61,520  | 55,200  | 116,720 |
| 2002 | 13,729 | 10,371 | 51,627  | 47,480  | 21.0 | 17.9 | 65,356  | 57,851  | 123,207 |
| 2003 | 13,845 | 10,452 | 56,329  | 51,822  | 19.7 | 16.8 | 70,174  | 62,274  | 132,448 |
| 2004 | 13,948 | 10,479 | 61,908  | 56,419  | 18.4 | 15.7 | 75,856  | 66,898  | 142,754 |
| 2005 | 14,012 | 10,567 | 67,642  | 61,118  | 17.2 | 14.7 | 81,654  | 71,685  | 153,339 |
| 2006 | 14,072 | 10,644 | 72,161  | 64,348  | 16.3 | 14.2 | 86,233  | 74,992  | 161,225 |
| 2007 | 14,209 | 10,715 | 76,556  | 66,962  | 15.7 | 13.8 | 90,765  | 77,677  | 168,442 |
| 2008 | 14,339 | 10,801 | 81,389  | 70,320  | 15.0 | 13.3 | 95,728  | 81,121  | 176,849 |
| 2009 | 14,485 | 10,901 | 87,374  | 74,596  | 14.2 | 12.8 | 101,859 | 85,497  | 187,356 |
| 2010 | 14,648 | 10,979 | 93,778  | 78,796  | 13.5 | 12.2 | 108,426 | 89,775  | 198,201 |
| 2011 | 14,745 | 11,078 | 101,220 | 83,763  | 12.7 | 11.7 | 115,965 | 94,841  | 210,806 |
| 2012 | 14,860 | 11,177 | 112,085 | 93,133  | 11.7 | 10.7 | 126,945 | 104,310 | 231,255 |
| 2013 | 14,988 | 11,289 | 119,930 | 99,369  | 11.1 | 10.2 | 134,918 | 110,658 | 245,576 |
| 2014 | 15,116 | 11,458 | 125,077 | 103,338 | 10.8 | 10.0 | 140,193 | 114,796 | 254,989 |
| 2015 | 15,304 | 11,614 | 129,587 | 106,584 | 10.6 | 9.8  | 144,891 | 118,198 | 263,089 |
| 2016 | 15,512 | 11,826 | 134,172 | 109,844 | 10.4 | 9.7  | 149,684 | 121,670 | 271,354 |
| 2017 | 15,684 | 11,930 | 139,209 | 113,307 | 10.1 | 9.5  | 154,893 | 125,237 | 280,130 |

Table ESM 3: *Crude prevalence (%) of diabetes in Denmark at 1 January 1996–2017 by diabetes type and sex. Includes also persons over 100 years of age.*

| Date | T1D  |      | T2D  |      | All DM |      |      |
|------|------|------|------|------|--------|------|------|
|      | M    | W    | M    | W    | M      | W    | M+W  |
| 1996 | 0.47 | 0.36 | 1.16 | 1.17 | 1.64   | 1.53 | 1.58 |
| 1997 | 0.48 | 0.37 | 1.29 | 1.27 | 1.78   | 1.64 | 1.71 |
| 1998 | 0.49 | 0.37 | 1.41 | 1.36 | 1.90   | 1.73 | 1.81 |
| 1999 | 0.50 | 0.38 | 1.54 | 1.45 | 2.05   | 1.83 | 1.94 |
| 2000 | 0.51 | 0.38 | 1.68 | 1.56 | 2.19   | 1.94 | 2.06 |
| 2001 | 0.51 | 0.38 | 1.81 | 1.66 | 2.32   | 2.04 | 2.17 |
| 2002 | 0.52 | 0.38 | 1.94 | 1.74 | 2.45   | 2.13 | 2.29 |
| 2003 | 0.52 | 0.38 | 2.11 | 1.90 | 2.62   | 2.28 | 2.45 |
| 2004 | 0.52 | 0.38 | 2.31 | 2.06 | 2.83   | 2.45 | 2.64 |
| 2005 | 0.52 | 0.39 | 2.52 | 2.23 | 3.04   | 2.61 | 2.82 |
| 2006 | 0.52 | 0.39 | 2.68 | 2.34 | 3.20   | 2.73 | 2.96 |
| 2007 | 0.52 | 0.39 | 2.83 | 2.43 | 3.35   | 2.82 | 3.08 |
| 2008 | 0.53 | 0.39 | 2.99 | 2.54 | 3.52   | 2.93 | 3.22 |
| 2009 | 0.53 | 0.39 | 3.19 | 2.68 | 3.72   | 3.07 | 3.39 |
| 2010 | 0.53 | 0.39 | 3.41 | 2.82 | 3.94   | 3.21 | 3.57 |
| 2011 | 0.53 | 0.39 | 3.66 | 2.98 | 4.19   | 3.38 | 3.78 |
| 2012 | 0.54 | 0.40 | 4.04 | 3.30 | 4.57   | 3.70 | 4.13 |
| 2013 | 0.54 | 0.40 | 4.30 | 3.51 | 4.84   | 3.91 | 4.37 |
| 2014 | 0.54 | 0.40 | 4.46 | 3.64 | 5.00   | 4.04 | 4.52 |
| 2015 | 0.54 | 0.41 | 4.59 | 3.73 | 5.13   | 4.13 | 4.63 |
| 2016 | 0.54 | 0.41 | 4.70 | 3.81 | 5.24   | 4.22 | 4.73 |
| 2017 | 0.54 | 0.41 | 4.83 | 3.90 | 5.38   | 4.31 | 4.84 |

## REFERENCES

11

Table ESM 4: *Number of incident diabetes cases during each year 1996–2016 by diabetes type and sex. Excludes persons over 100 years of age and persons not resident at date of diagnosis.*

| Period | T1D    |       | T2D     |         | All DM  |         |         |
|--------|--------|-------|---------|---------|---------|---------|---------|
|        | M      | W     | M       | W       | M       | W       | M+W     |
| 1996   | 678    | 516   | 6,115   | 5,290   | 6,793   | 5,806   | 12,599  |
| 1997   | 684    | 489   | 5,839   | 4,918   | 6,523   | 5,407   | 11,930  |
| 1998   | 657    | 454   | 6,529   | 5,295   | 7,186   | 5,749   | 12,935  |
| 1999   | 592    | 413   | 6,739   | 5,707   | 7,331   | 6,120   | 13,451  |
| 2000   | 596    | 392   | 6,593   | 5,604   | 7,189   | 5,996   | 13,185  |
| 2001   | 586    | 415   | 6,795   | 5,449   | 7,381   | 5,864   | 13,245  |
| 2002   | 602    | 386   | 8,022   | 7,334   | 8,624   | 7,720   | 16,344  |
| 2003   | 545    | 386   | 9,146   | 7,673   | 9,691   | 8,059   | 17,750  |
| 2004   | 509    | 388   | 9,259   | 7,751   | 9,768   | 8,139   | 17,907  |
| 2005   | 517    | 379   | 8,174   | 6,510   | 8,691   | 6,889   | 15,580  |
| 2006   | 554    | 382   | 8,172   | 5,940   | 8,726   | 6,322   | 15,048  |
| 2007   | 564    | 384   | 8,738   | 6,792   | 9,302   | 7,176   | 16,478  |
| 2008   | 546    | 367   | 9,846   | 7,554   | 10,392  | 7,921   | 18,313  |
| 2009   | 568    | 357   | 10,762  | 7,720   | 11,330  | 8,077   | 19,407  |
| 2010   | 529    | 367   | 11,867  | 8,704   | 12,396  | 9,071   | 21,467  |
| 2011   | 496    | 358   | 15,593  | 13,150  | 16,089  | 13,508  | 29,597  |
| 2012   | 486    | 315   | 12,782  | 10,017  | 13,268  | 10,332  | 23,600  |
| 2013   | 471    | 351   | 10,215  | 7,971   | 10,686  | 8,322   | 19,008  |
| 2014   | 465    | 341   | 9,883   | 7,358   | 10,348  | 7,699   | 18,047  |
| 2015   | 476    | 375   | 9,987   | 7,638   | 10,463  | 8,013   | 18,476  |
| 2016   | 460    | 316   | 10,666  | 7,855   | 11,126  | 8,171   | 19,297  |
| Sum    | 11,581 | 8,131 | 191,722 | 152,230 | 203,303 | 160,361 | 363,664 |

Table ESM 5: *Number of deaths among diabetes patients during each year 1996–2016 by diabetes type and sex. Only diabetes patients diagnosed since 1996-01-01.*

| Period | T1D |     | T2D   |       | All DM |       |       | non-DM |
|--------|-----|-----|-------|-------|--------|-------|-------|--------|
|        | M   | W   | M     | W     | M      | W     | M+W   | M+W    |
| 1996   | 14  | 12  | 255   | 222   | 269    | 234   | 503   | 53,839 |
| 1997   | 28  | 16  | 577   | 455   | 605    | 471   | 1,076 | 53,020 |
| 1998   | 50  | 30  | 860   | 715   | 910    | 745   | 1,655 | 51,549 |
| 1999   | 85  | 34  | 1,217 | 908   | 1,302  | 942   | 2,244 | 51,971 |
| 2000   | 101 | 58  | 1,435 | 1,180 | 1,536  | 1,238 | 2,774 | 50,206 |
| 2001   | 97  | 83  | 1,737 | 1,356 | 1,834  | 1,439 | 3,273 | 50,734 |
| 2002   | 142 | 70  | 1,929 | 1,616 | 2,071  | 1,686 | 3,757 | 50,474 |
| 2003   | 141 | 100 | 2,279 | 1,828 | 2,420  | 1,928 | 4,348 | 49,280 |
| 2004   | 157 | 102 | 2,349 | 1,968 | 2,506  | 2,070 | 4,576 | 47,276 |
| 2005   | 196 | 111 | 2,600 | 2,194 | 2,796  | 2,305 | 5,101 | 46,366 |
| 2006   | 189 | 129 | 2,736 | 2,335 | 2,925  | 2,464 | 5,389 | 46,122 |
| 2007   | 186 | 108 | 2,990 | 2,529 | 3,176  | 2,637 | 5,813 | 46,507 |
| 2008   | 206 | 128 | 3,083 | 2,536 | 3,289  | 2,664 | 5,953 | 45,115 |
| 2009   | 194 | 129 | 3,507 | 2,797 | 3,701  | 2,926 | 6,627 | 45,008 |
| 2010   | 199 | 125 | 3,664 | 2,970 | 3,863  | 3,095 | 6,958 | 44,088 |
| 2011   | 166 | 107 | 3,831 | 2,999 | 3,997  | 3,106 | 7,103 | 42,294 |
| 2012   | 151 | 105 | 4,159 | 3,138 | 4,310  | 3,243 | 7,553 | 41,579 |
| 2013   | 147 | 84  | 4,336 | 3,341 | 4,483  | 3,425 | 7,908 | 41,183 |
| 2014   | 114 | 95  | 4,613 | 3,544 | 4,727  | 3,639 | 8,366 | 39,944 |
| 2015   | 123 | 81  | 4,796 | 3,779 | 4,919  | 3,860 | 8,779 | 40,947 |
| 2016   | 133 | 76  | 4,988 | 3,874 | 5,121  | 3,950 | 9,071 | 40,643 |

## REFERENCES

13

Table ESM 6: *Number of deaths among diabetes patients during each year 1996–2016 by diabetes type and sex. Includes both diabetes patients diagnosed from 1996-01-01 as well as prevalent cases of diabetes at this date.*

| Period | T1D |     | T2D   |       | All DM |       |        | non-DM |
|--------|-----|-----|-------|-------|--------|-------|--------|--------|
|        | M   | W   | M     | W     | M      | W     | M+W    | M+W    |
| 1996   | 363 | 334 | 2,798 | 2,621 | 3,161  | 2,955 | 6,116  | 53,839 |
| 1997   | 442 | 311 | 2,819 | 2,734 | 3,261  | 3,045 | 6,306  | 53,020 |
| 1998   | 420 | 340 | 2,928 | 2,709 | 3,348  | 3,049 | 6,397  | 51,549 |
| 1999   | 453 | 331 | 3,193 | 2,864 | 3,646  | 3,195 | 6,841  | 51,971 |
| 2000   | 453 | 361 | 3,168 | 2,965 | 3,621  | 3,326 | 6,947  | 50,206 |
| 2001   | 433 | 357 | 3,276 | 2,988 | 3,709  | 3,345 | 7,054  | 50,734 |
| 2002   | 513 | 323 | 3,453 | 3,117 | 3,966  | 3,440 | 7,406  | 50,474 |
| 2003   | 473 | 381 | 3,667 | 3,226 | 4,140  | 3,607 | 7,747  | 49,280 |
| 2004   | 466 | 319 | 3,655 | 3,169 | 4,121  | 3,488 | 7,609  | 47,276 |
| 2005   | 487 | 329 | 3,724 | 3,362 | 4,211  | 3,691 | 7,902  | 46,366 |
| 2006   | 450 | 337 | 3,832 | 3,381 | 4,282  | 3,718 | 8,000  | 46,122 |
| 2007   | 425 | 278 | 3,911 | 3,544 | 4,336  | 3,822 | 8,158  | 46,507 |
| 2008   | 382 | 261 | 3,984 | 3,407 | 4,366  | 3,668 | 8,034  | 45,115 |
| 2009   | 357 | 256 | 4,464 | 3,639 | 4,821  | 3,895 | 8,716  | 45,008 |
| 2010   | 348 | 235 | 4,452 | 3,773 | 4,800  | 4,008 | 8,808  | 44,088 |
| 2011   | 311 | 200 | 4,614 | 3,714 | 4,925  | 3,914 | 8,839  | 42,294 |
| 2012   | 258 | 170 | 4,926 | 3,804 | 5,184  | 3,974 | 9,158  | 41,579 |
| 2013   | 240 | 143 | 5,054 | 3,994 | 5,294  | 4,137 | 9,431  | 41,183 |
| 2014   | 180 | 135 | 5,327 | 4,104 | 5,507  | 4,239 | 9,746  | 39,944 |
| 2015   | 185 | 118 | 5,431 | 4,345 | 5,616  | 4,463 | 10,079 | 40,947 |
| 2016   | 174 | 124 | 5,598 | 4,363 | 5,772  | 4,487 | 10,259 | 40,643 |

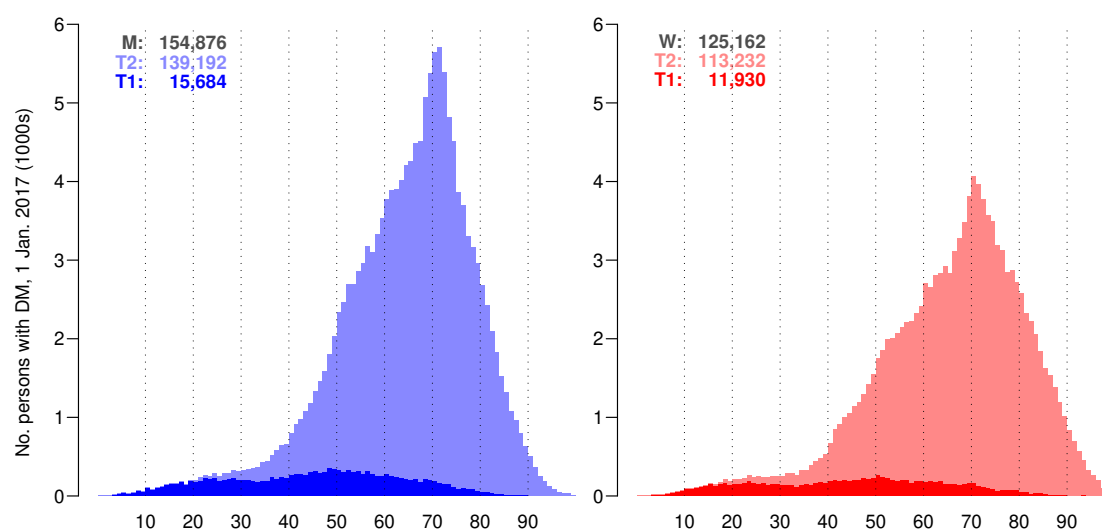

Figure ESM1: Number of T1D (dark color) and T2D (bright color) patients in Denmark as of 1 January 2017, the blue bars are men, red bars are women. The numbers in the corner of the plots indicate the number of prevalent cases, the black numbers are the total number of prevalent cases.



## REFERENCES

15

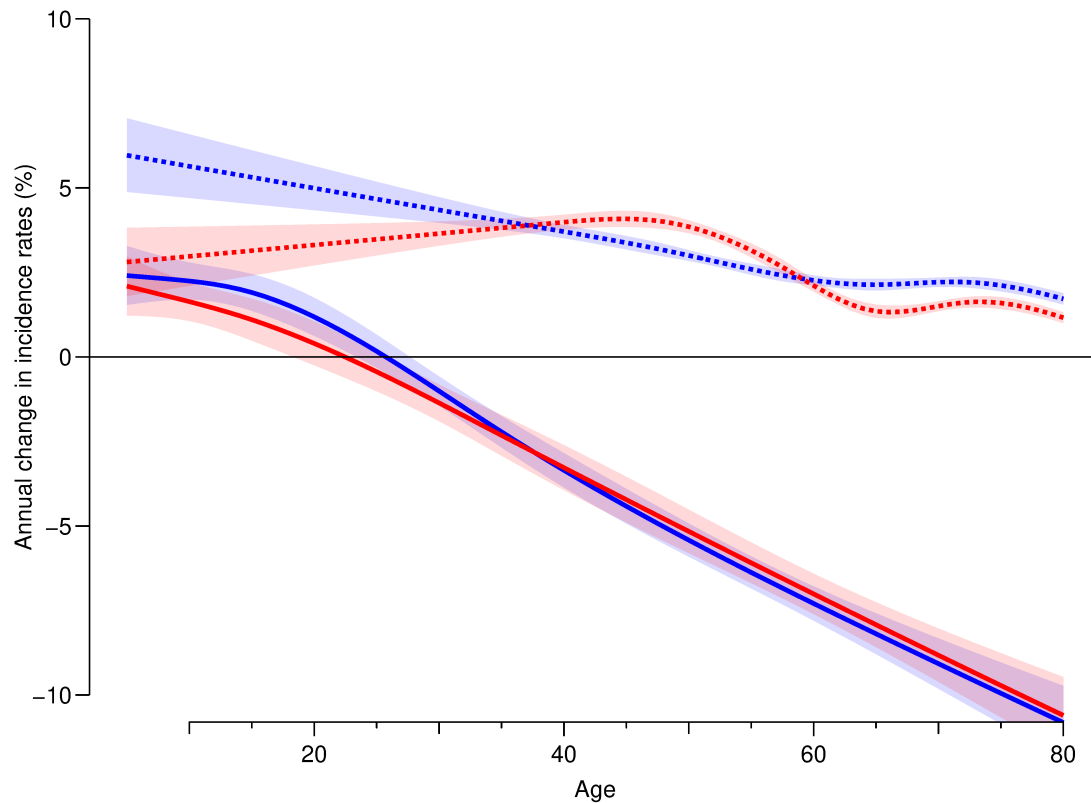

Figure ESM 2: Age-specific average annual change in incidence rates of T1D and T2D in Denmark 1996–2016; a.k.a. “local drifts”. Estimates are from models with a smooth effect of age and an interaction between a smooth age term and a linear calendar time term (varying coefficients model). Full lines are T1D, broken lines T2D, blue curves are men, red curves women. The shaded areas indicate 95% confidence intervals.

It is seen that a summary of overall annual increase in T2D of 3.5% is quite reasonable, but that the change in incidence rates of T1D is positive under age 20 and negative over age 30.

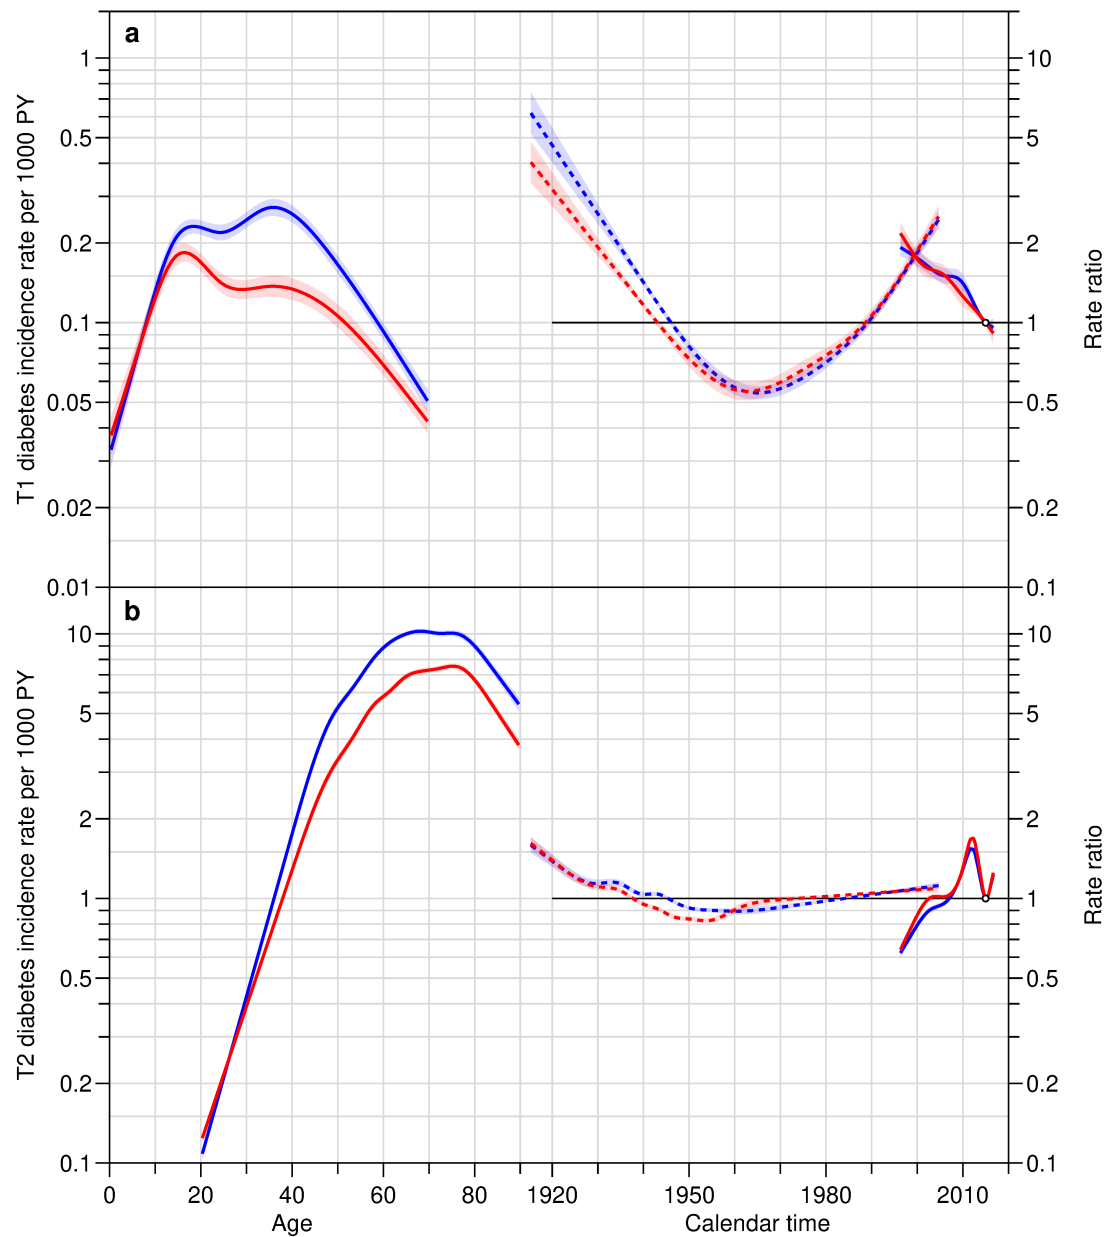

Figure ESM 3: *Estimates of effects from Age-Period-Cohort models for diabetes incidence rates in Denmark, using smooth effects of age, period and cohort (restricted cubic splines): Age-specific incidence rates (leftmost curves) as of 1 January 2015, period effects relative to this (rightmost curves, full lines) and cohort residual curves (middle set of curves — broken lines). Upper panel: T1D, lower panel: T2D. Blue curves are men, red curves women; shaded areas represent 95% confidence intervals.*

*Note that all vertical axes have the same relative extent, namely a factor 150 from bottom to top. Likewise, one year of age, date of birth and date of FU has the same physical extent on the horizontal axes.*

## REFERENCES

17

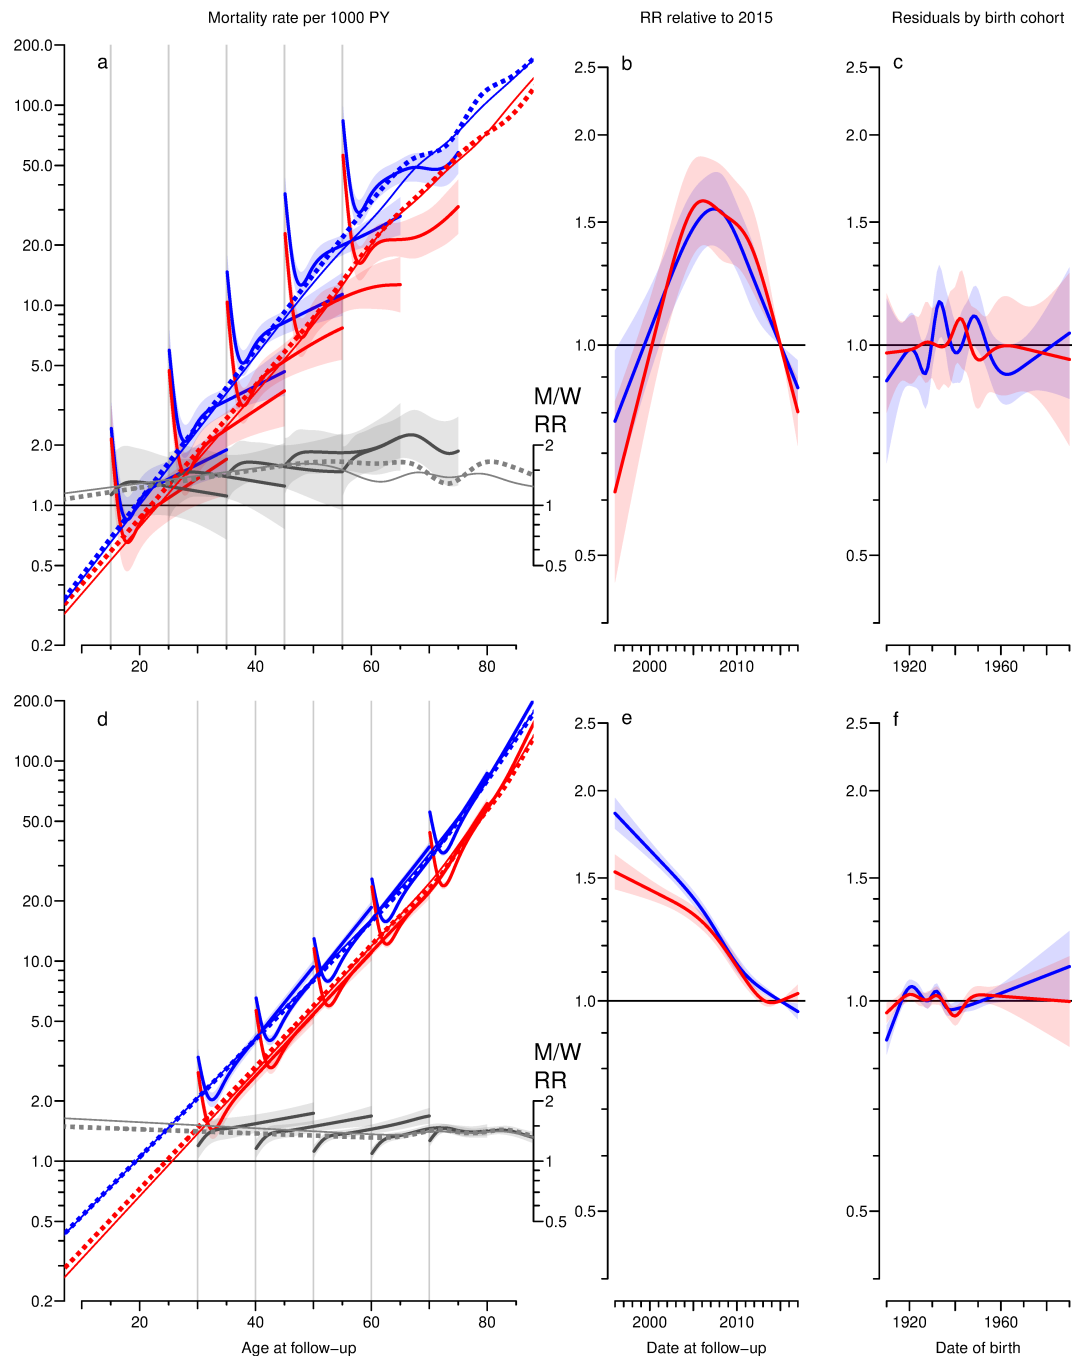

Figure ESM4: Mortality (a,d), and RR relative to 2015-01-01 (b,e) and birth cohort residuals (c,f). Upper panels (a,b,c) are T1D and lower panels (d,e,f) are T2D. Leftmost plot shows the mortality rates at 2015-01-01 for persons diagnosed in ages 15, 25, ..., followed for 0–20 years of diabetes duration. These curves are the same as those in figure 3 of the main paper. Broken lines in leftmost plot are mortality rates modeled ignoring age at diagnosis and duration of diabetes. Thin full lines are overall mortality also including prevalent cases as of 1996-01-01.

Red curves are for women, blue for men, black are M/W RR; shaded areas indicate 95% confidence intervals.

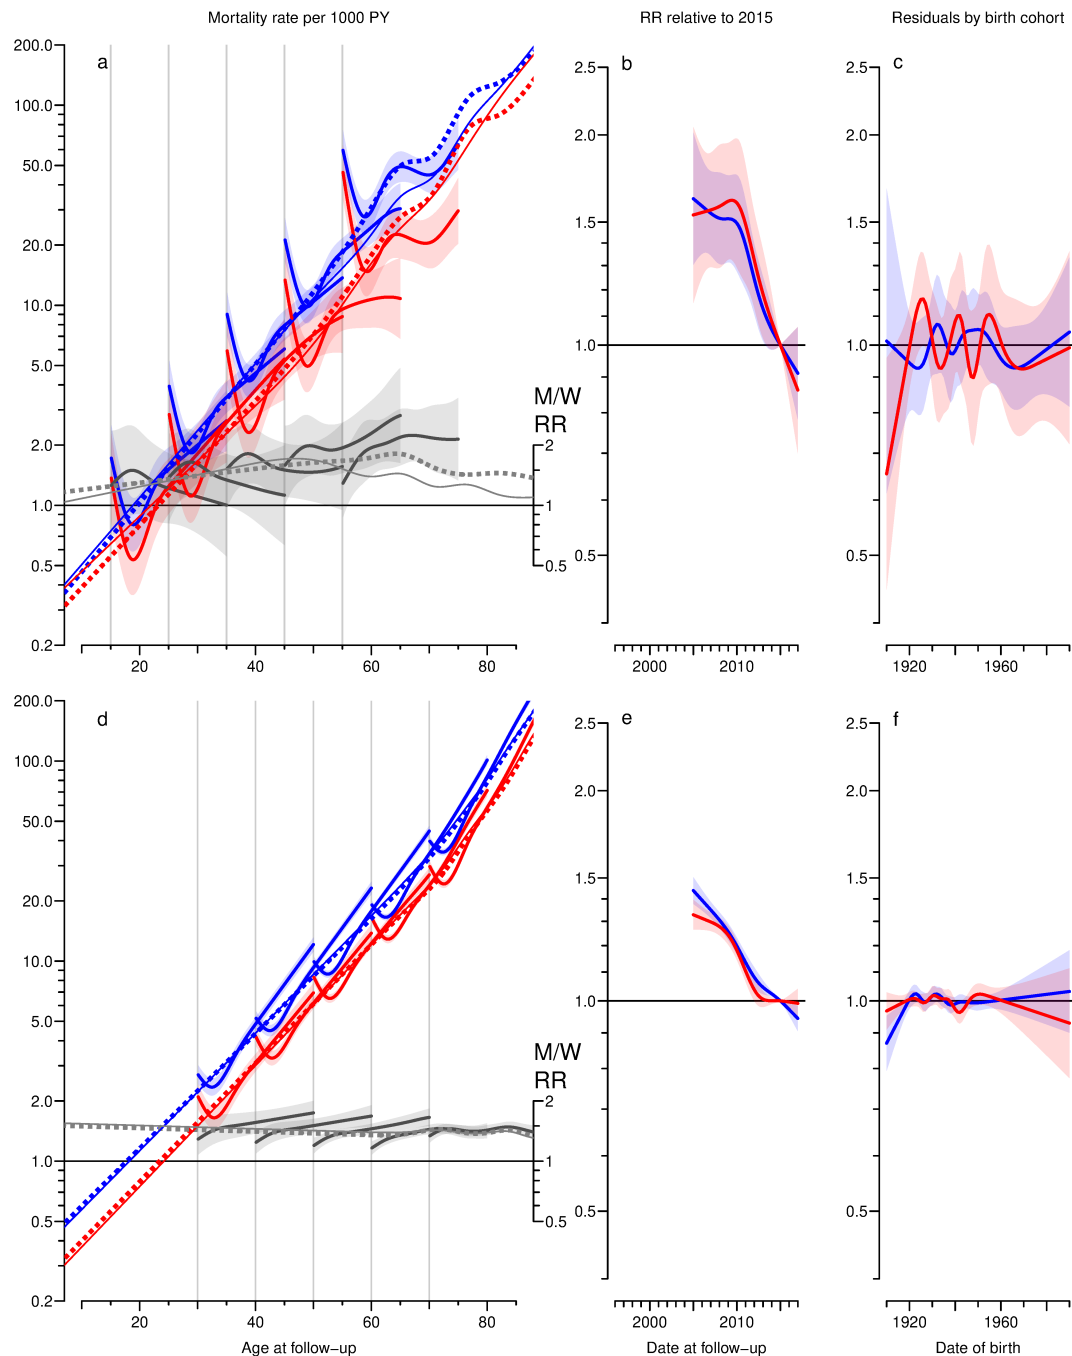

Figure ESM5: Mortality (a,d), and RR relative to 2015-01-01 (b,e) and birth cohort residuals (c,f), based on follow up after 2005 only. Upper panels (a,b,c) are T1D and lower panels (d,e,f) are T2D. Leftmost plot shows the mortality rates at 2015-01-01 for persons diagnosed in ages 15, 25, . . . , followed for 0–20 years of diabetes duration. Broken lines in leftmost plot are mortality rates modeled ignoring age at diagnosis and duration of diabetes. Thin full lines are overall mortality also including prevalent cases as of 1996-01-01. Red curves are for women, blue for men, black are M/W RR; shaded areas indicate 95% confidence intervals.

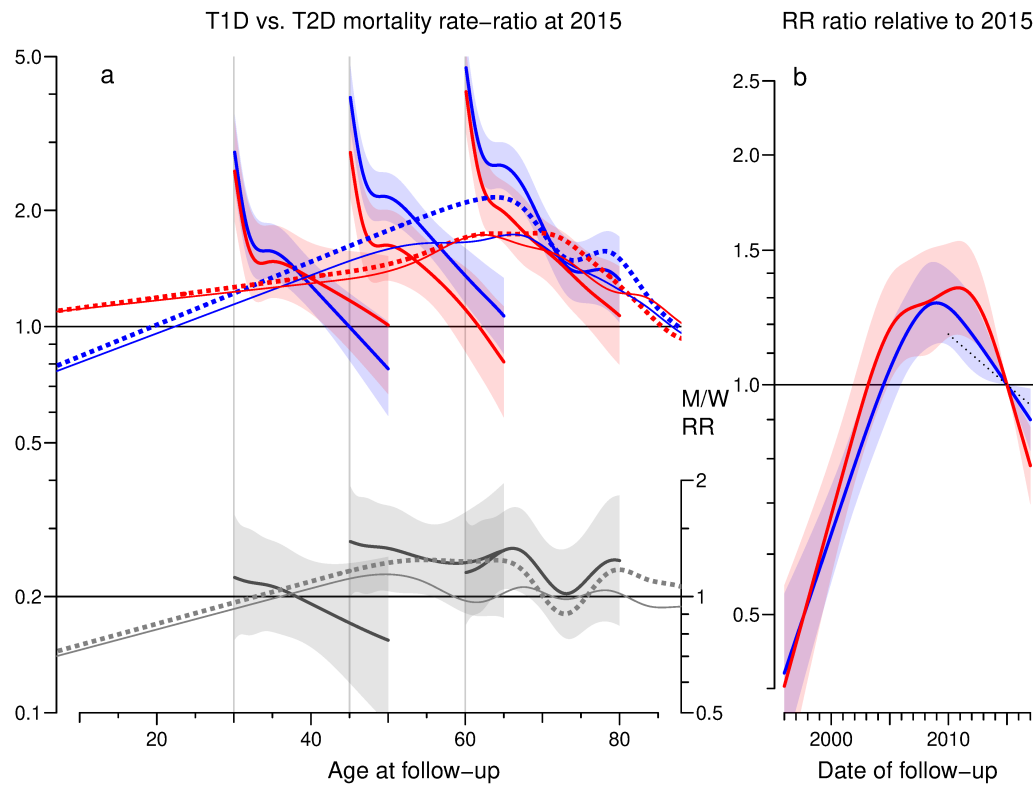

Figure ESM 6: *T1D versus T2D mortality RR at 2015-01-01. Leftmost plot shows the mortality RR at 2015-01-01 for persons diagnosed in ages 30, 45 and 60 years. Broken lines in leftmost plot are mortality RRs modeled ignoring age at diagnosis and duration of diabetes. Thin full lines are overall mortality RR also including prevalent cases as of 1996-01-01.*

*Red curves are for women, blue for men, black are M/W RR ratio; shaded areas indicate 95% confidence intervals.*

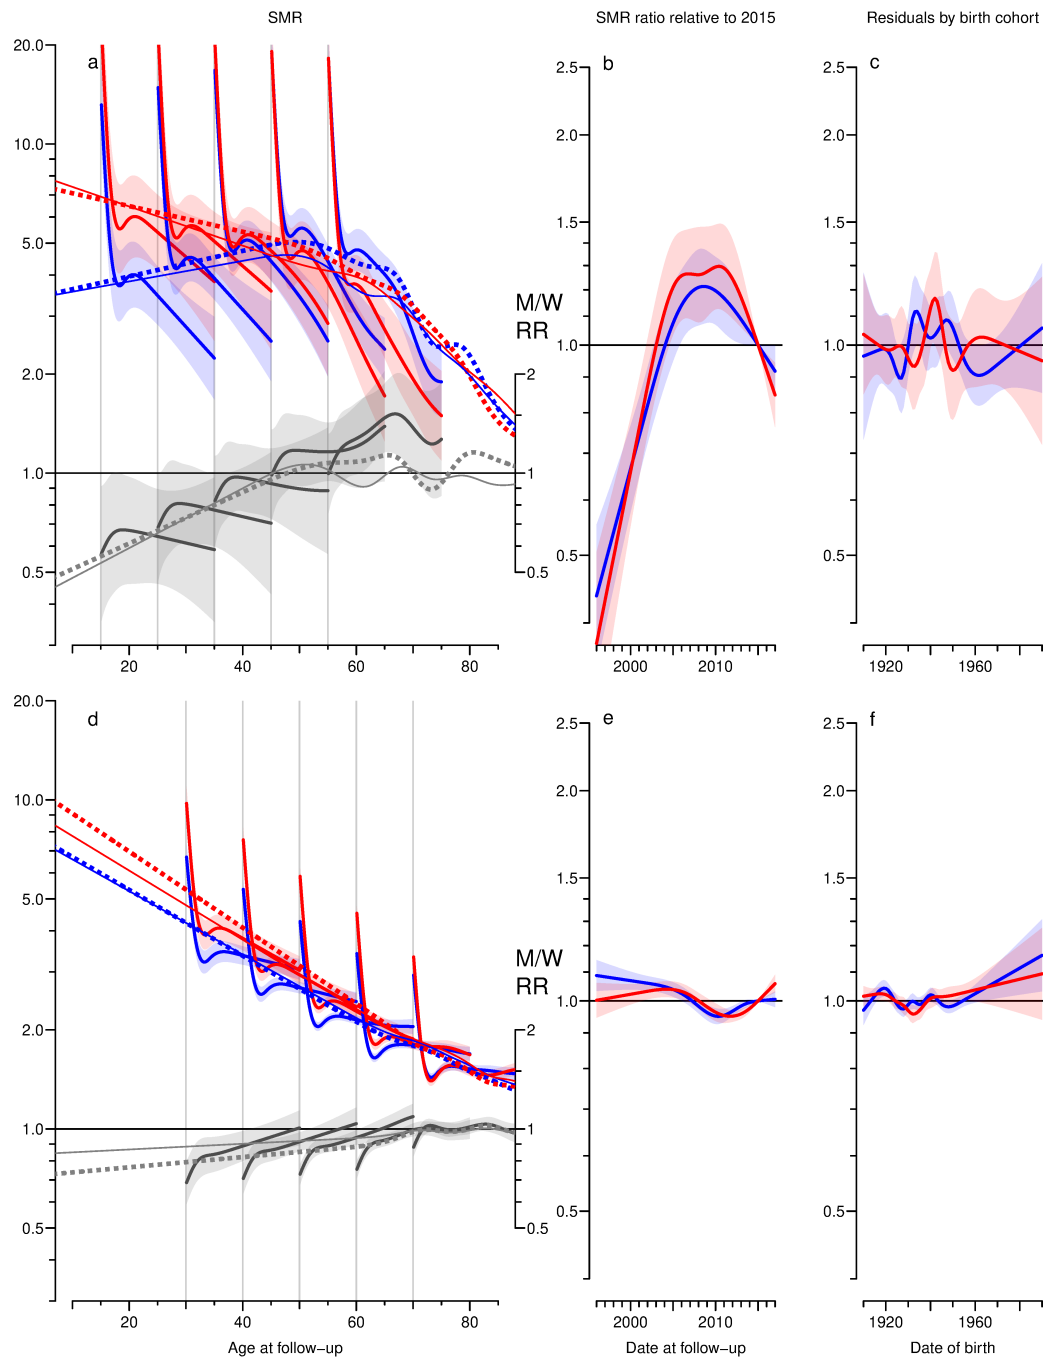

Figure ESM7: SMR (a,c) SMR-ratios relative to 2015-01-01 (b,d) and birth cohort residuals (c,f). The leftmost plots (a,c) shows the mortality rates at 2015-01-01 for persons diagnosed in ages 15, 30, 45, 60 and 75 followed for 0–20 years of diabetes duration. Broken lines in leftmost plot are SMR modeled ignoring age at diagnosis and duration of diabetes. Thin full lines represent SMR also including prevalent cases as of 1996-01-01. Red curves are for women, blue for men, black are SMR ratios between M and W; shaded areas indicate 95% confidence intervals.
